# Supplementary material
Source: Springer Nature journal article supplement (https://www.springermedizin.de/resource/supplementary/12950_2007_49_MOESM8_ESM.pdf/9557832)

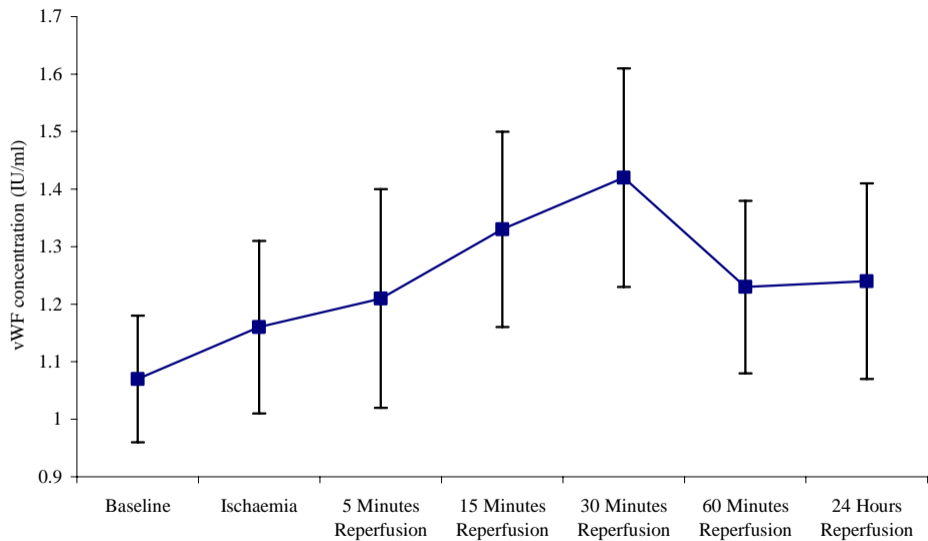

Supplement: MOESM8 [file 9557832]
